# Supplementary material
Source: publisher figshare collection journal article supplement (https://gsajournals.figshare.com/ndownloader/files/16191359)
Supplement: Supplementary file 1 [file 16191359]

**Table Supplementary S3** Putative single nucleotide polymorphism coordinates for the partial sequences of three candidate anthracnose resistant loci in sorghum.

| Candidate Genes and SNP Coordinate a | | |  |  | Amplicon of 699 bp b |
| --- | --- | --- | --- | --- | --- |
| *Sobic.09G013000* | *Sobic.09G013100* | *Sobic.09G013300* | BTx623 a |  | Ethiopian and SAP c |
| S9_1134908 | S9_1156835 | S9_1175714 | G |  | A/G |
| S9_1134923 | S9_1156850 | S9_1175729 | C |  | C/A |
| S9_1134947 | S9_1156874 | S9_1175753 | A |  | A/G |
| S9_1134964 | S9_1156891 | S9_1175770 | G |  | G/A |
| S9_1135069 | S9_1156996 | S9_1175875 | G |  | G/A |
| S9_1135124 | S9_1157051 | S9_1175930 | C |  | C/T |
| S9_1135126 | S9_1157053 | S9_1175932 | A |  | A/G |
| S9_1135139 | S9_1157066 | S9_1175945 | T |  | T/G |
| S9_1135165 | S9_1157092 | S9_1175971 | G |  | G/T |
| S9_1135178 | S9_1157105 | S9_1175984 | C |  | C/T |
| S9_1135213 | S9_1157140 | S9_1176019 | G |  | G/A |
| S9_1135221 | S9_1157148 | S9_1176027 | G |  | G/C |
| S9_1135250 | S9_1157177 | S9_1176056 | G |  | A/G |
| S9_1135271 | S9_1157198 | S9_1176077 | C |  | C/A |
| S9_1135339 | S9_1157266 | S9_1176145 | A |  | A/C |
| S9_1135368 | S9_1157295 | S9_1176174 | C |  | C/T |
| S9_1135435 | S9_1157362 | S9_1176242 | A |  | A/C |

a Sorghum genome reference V.3 ([www.phytozome.com](http://www.phytozome.com))

b The amplicon includes the 3 genes (i.e. 6 alleles) produced with the forward (TTCATCTGCAGGGGTTTAGG) and reverse (GTCATGGCAAATGTGTTTGG) primers with an annealing temperature of 600C.

c Sequencing analysis based on 70 accessions from NPGS Ethiopian germplasm collection and 26 accessions from sorghum association panel (SAP).
